1

2

3

4

5

6

7

8

9

10

11

12

13

14

15

16

17

18

19

20

21

22

23

24

25

26

27

28

29

30

31

32

33

34

35

36

37

38

39

40

41

42

43

44

45

---

# Generative modeling and latent space arithmetics predict single-cell perturbation response across cell types, studies and species

---

M. Lotfollahi<sup>1</sup>, F. Alexander Wolf<sup>1†</sup> & Fabian J. Theis<sup>1,2‡</sup>

<sup>1</sup> Helmholtz Center Munich – German Research Center for Environmental Health, Institute of Computational Biology, Neuherberg, Munich, Germany.

<sup>2</sup> Department of Mathematics, Technische Universität München, Munich, Germany.

† alex.wolf@helmholtz-muenchen.de ‡ fabian.theis@helmholtz-muenchen.de

## Abstract

Accurately modeling cellular response to perturbations is a central goal of computational biology. While such modeling has been proposed based on statistical, mechanistic and machine learning models in specific settings, no generalization of predictions to phenomena absent from training data (‘out-of-sample’) has yet been demonstrated. Here, we present scGen, a model combining variational autoencoders and latent space vector arithmetics for high-dimensional single-cell gene expression data. In benchmarks across a broad range of examples, we show that scGen accurately models dose and infection response of cells across cell types, studies and species. In particular, we demonstrate that scGen learns cell type and species specific response implying that it captures features that distinguish responding from non-responding genes and cells. With the upcoming availability of large-scale atlases of organs in healthy state, we envision scGen to become a tool for experimental design through *in silico* screening of perturbation response in the context of disease and drug treatment.

## Introduction

Single-cell transcriptomics has become an established tool for unbiased profiling of complex and heterogeneous systems [1, 2]. The generated datasets are typically used for explaining phenotypes through cellular composition and dynamics. Of particular interest is the dynamics of single cells in response to perturbations, be it to dose [3], treatment [4, 5] or knock-out of genes [6–8]. Although advances in single-cell differential expression analysis [9, 10] enabled the identification of genes associated with a perturbation, generative modeling of perturbation response takes a step further in that it enables *in silico* generation of data. The ability of generating data that cover phenomena not seen during training, is particularly useful and referred to as ‘out-of-sample’ prediction.

While dynamic mechanistic models have been suggested for predicting low-dimensional quantities that characterize cellular response [11, 12], such as a scalar measure of proliferation, they face fundamental problems. These models cannot be easily formulated in a data-driven way and require temporal resolution of the experimental data. Due to the typically small number of time points available, parameters are often hard to identify. Resorting to linear statistical models for modeling perturbation response [6, 8], by contrast, leads to small predictive power for the complicated nonlinear effects that single-cell data display. By contrast, neural network models do not face these limits.

Recently, such models have been suggested for the analysis of single-cell RNA-seq data [13–17]. In particular, generative adversarial networks (GANs) have been proposed for simulating single cell differentiation through so a called latent space interpolation [16]. While being an interesting alternative to established pseudotemporal ordering algorithms [18], this analysis does not demonstrate the GAN’s capability of out-of-sample prediction. The use of GANs for the harder task of out-of-sample

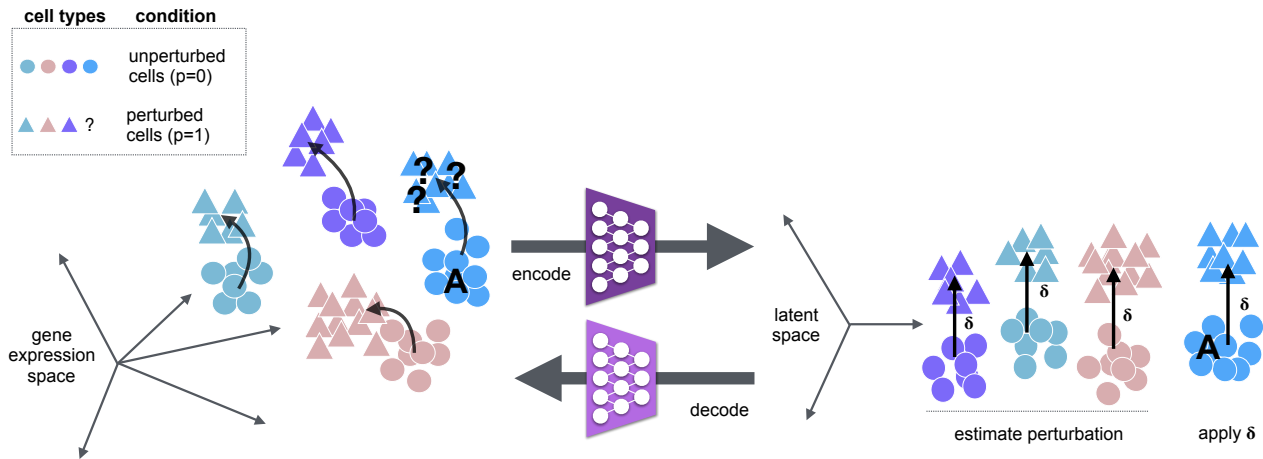

**Figure 1 | scGen, a method to predict single cell perturbation response.** Given a set of observed cell types in control and stimulation, we aim to predict the perturbation response of a new cell type A (blue) by training a model that learns to generalize the response of the cells in the training set. Within scGen, the model is a variational autoencoder and the predictions are obtained using vector arithmetics in the autoencoder’s latent space. Specifically, we project gene expression measurements into a latent space using an encoder network and obtain a vector  $\delta$  that represents the difference between perturbed and unperturbed cells from the training set in latent space. Using  $\delta$ , unperturbed cells of type A are linearly extrapolated in latent space. The decoder network then maps the linear latent space predictions to highly non-linear predictions in gene expression space.

46 prediction is hindered by fundamental difficulties: (1) GANs are hard to train for structured high-  
 47 dimensional data, leading to high-variance predictions with large errors in extrapolation, and (2),  
 48 GANs do not allow to directly map a gene expression vector  $x$  on a latent space vector  $z$ , making it  
 49 hard to impossible to generate a cell with wished properties. In addition, GANs for structured data  
 50 have not yet shown advantages over the simpler variational autoencoders (VAE) [19] (Supplemental  
 51 Note 1.1).

52 To overcome the problems inherent to GANs, we built scGen based on a VAE combined with vector  
 53 arithmetics with an architecture adapted for single-cell RNA-seq data. For the first time, scGen  
 54 enables predictions of dose and infection response of cells for phenomena absent from training data  
 55 across cell types, studies and species. In a broad benchmark, it outperforms other potential modeling  
 56 approaches such as linear methods, conditional variational autoencoders and style-transfer GANs.  
 57 The benchmark of several generative neural network models should present a valuable resource for the  
 58 community showing opportunities and limitations for such models when applied to transcriptomic  
 59 data. scGen is based on Tensorflow [20] and on the single-cell analysis toolbox Scanpy [21].

## 60 Results

### 61 scGen accurately predicts single-cell perturbation response out-of-sample

62 High-dimensional scRNA-seq data is typically assumed to be well-parametrized by a low-dimensional  
 63 manifold arising from the constraints of the underlying gene regulatory networks. Current algorithms  
 64 mostly focus on characterizing the manifold using graph-based techniques [24, 25] in the space  
 65 spanned by a few principal components. More recently, the manifold has been modeled using neural  
 66 networks [13–17]. As in other application fields [26, 27], in the latent spaces of these models, the  
 67 manifolds display astonishingly simple properties, such as approximately linear axes of variation for  
 68 latent variables explaining a major part of the variability in the data. Hence, linear extrapolations  
 69 of the low-dimensional manifold could in principle capture variability related to perturbation and  
 70 other covariates (Supplemental Note 1.2, Supplemental Figure 1).

71 Let every cell  $i$  with expression profile  $x_i$  be characterized by a variable  $p_i$ , which represents a

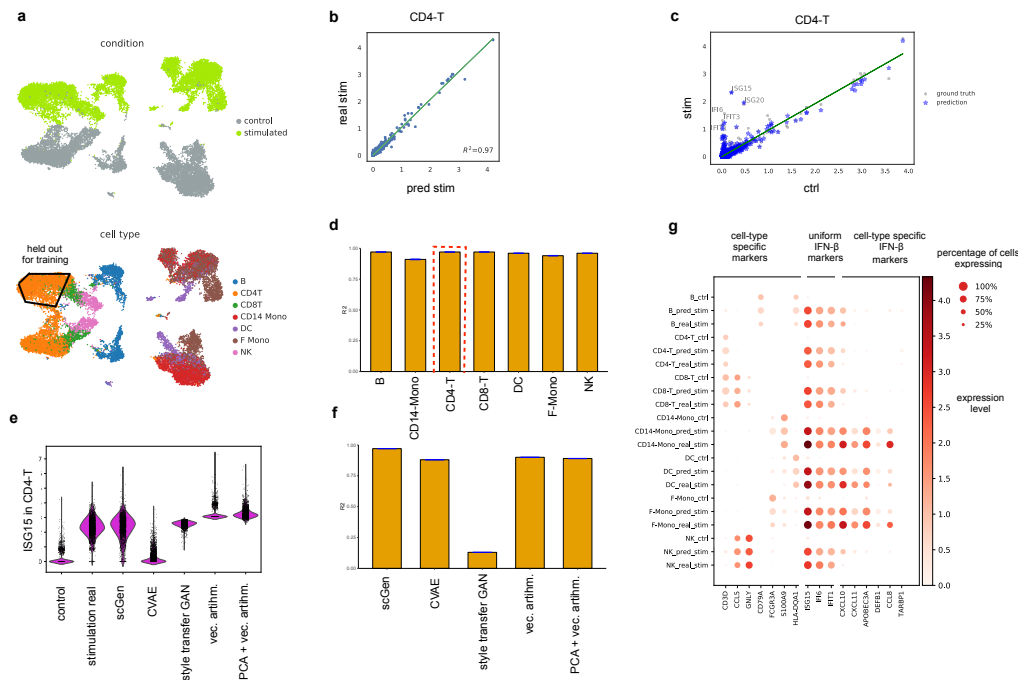

**Figure 2 | scGen accurately predicts single-cell perturbation response out-of-sample.** **a**, UMAP visualization [22] of the distributions of condition, cell type and data split for the prediction of IFN- $\beta$  stimulated CD4-T cells from altogether 16,893 PBMCs from Kang *et al.* [3]. **b**, Mean gene expression of 6,998 genes between scGen predicted and real stimulated CD4-T cells. **c**, Mean gene expression for control versus stimulated resp. predicted CD4-T cells together with top five upregulated differentially expressed genes. **d**, Comparison of  $R^2$  values for mean gene expression between real and predicted cells for the 7 different cell types of the study. **e**, Distribution of *ISG15*: the top uniform marker (response) gene to IFN- $\beta$  [23] between control, predicted and real stimulated cells of scGen when compared with other potential prediction models. **f**, Similar comparison of  $R^2$  values to predict unseen CD4-T stimulated cells. **g**, Dot plot for comparing control, true and predicted stimulation when predicting on seven cell types from Kang *et al.*

72 discrete attribute across the whole manifold, such as perturbation, species or batch. To start with,  
 73 we assume only two conditions 0 (unperturbed) and 1 (perturbed). Let us further consider the  
 74 conditional distribution  $P(x_i|z_i, p_i)$ , which assumes that each cell  $x_i$  comes from a low-dimensional  
 75 representation  $z_i$  in condition  $p_i$ . We use a VAE to model  $P(x_i|z_i, p_i)$  in its dependence on  $z_i$  and  
 76 vector arithmetics in the VAE's latent space to model the dependence on  $p_i$  (Figure 1).

77 Equipped with this, consider a typical extrapolation problem. Assume cell type  $A$  exists in the  
 78 training data only in the unperturbed ( $p = 0$ ) condition. From that, we predict the latent repre-  
 79 sentation of perturbed cells ( $p = 1$ ) of cell type  $A$  using  $\hat{z}_{i,A,p=1} = z_{i,A,p=0} + \delta$ , where  $z_{i,A,p=0}$  and  
 80  $\hat{z}_{i,A,p=1}$  denotes the latent representation of cells with cell type  $A$  in conditions  $p = 0$  and  $p = 1$ , re-  
 81 spectively and  $\delta$  is the difference vector of means between cells in the training set in condition 0 and  
 82 1 (Supplemental Note 1.3). From the latent space, scGen maps predicted cells to high-dimensional  
 83 gene expression space using the generator network estimated while training the VAE.

84 To demonstrate the performance of scGen, we apply it to published human PBMC samples in  
 85 control and under IFN- $\beta$  stimulation [3] (Supplemental Note 2). As a first test, we compare the  
 86 predictions of stimulated CD4-T cells held out during training (Figure 2a). scGen prediction of the  
 87 mean associated with the perturbation in CD4-T cells correlates well with the ground-truth across  
 88 all genes (Figure 2b). Comparing upregulated genes in stimulation (for example labeled transcripts  
 89 in Figure 2c) we observe that these genes very well coincide in real and predicted stimulated cells.  
 90 To evaluate generality, we trained six other models while holding out each of the six major cell types  
 91 present in the study. Figure 2d shows that our model accurately predicts all other cell types (average  
 92  $R^2 = 0.954$ ). Moreover, the distribution of the strongest regulated IFN- $\beta$  response gene *ISG15* as

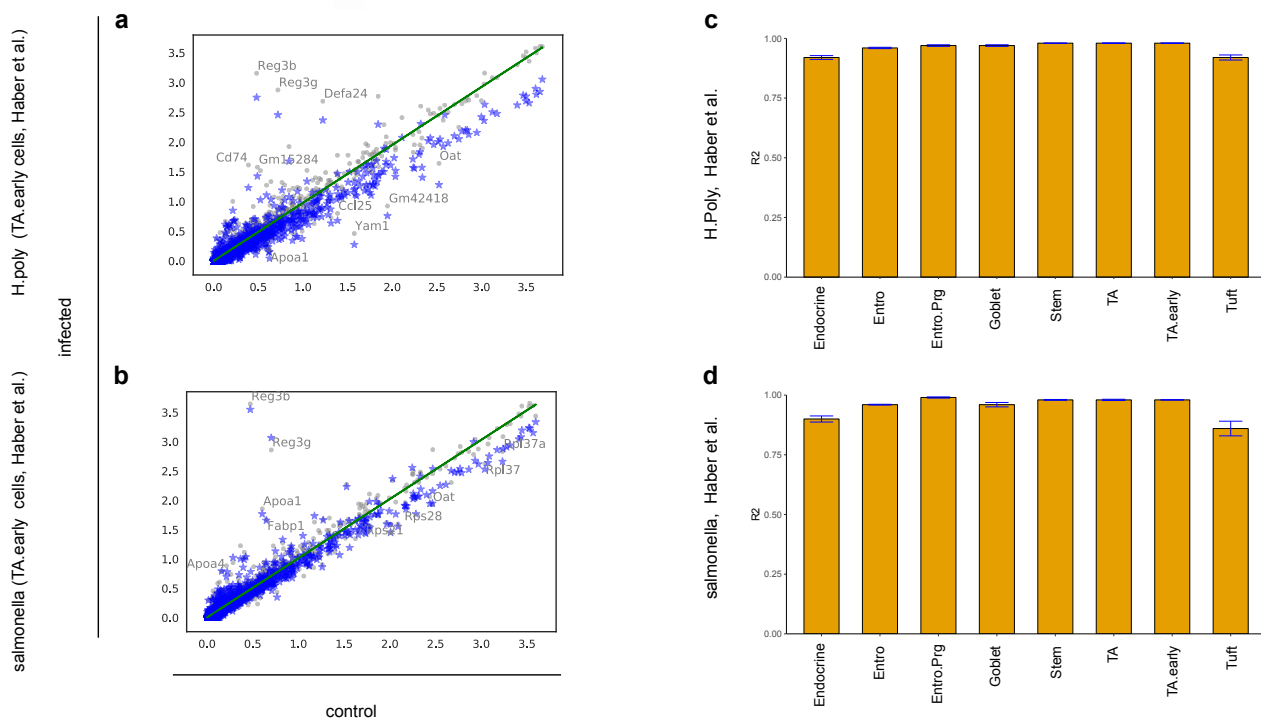

**Figure 3 | scGen models infection response in two datasets of intestinal epithelial cells. a-b,** Prediction of early transit-amplifying (TA.early) cells from two different small intestine datasets from Haber *et al.* [4] infected with *Salmonella* and helminth *Heligmosomoides polygyrus* (*H.poly*) after 2 and 10 days, respectively. The mean gene expression for infected and control for different cell types shows how scGen transforms control to predicted perturbed cells in a way that the expression of top 5 up and downregulated differentially expressed genes are similar to real infected cells. **c-d,** Comparison of  $R^2$  values for mean gene expression between real and predicted cells for all the cell types in two different datasets illustrates that scGen performs well for all cell types in different scenarios.

93 predicted by scGen not only provides a good estimate for the mean but also captures the variance  
 94 of the distribution (Figure 2e, all genes in Supplemental Figure 2a).

### 95 scGen outperforms alternative modeling approaches

96 Aside from scGen, we studied further natural candidates for modeling a conditional distribution that  
 97 is able to capture perturbation response. We benchmark scGen against four of these candidates,  
 98 including two generative neural networks and two linear models. The first of these models is the  
 99 conditional variational autoencoder (CVAE) (Supplemental Note 3, Supplemental Figure 3a, [28]),  
 100 which has recently been adapted to preprocessing, batch-correcting and differential testing of single-  
 101 cell data [13]. However, it has not been shown to be a viable approach for out-of-sample predictions,  
 102 even though, formally, it readily admits the generation of samples from different conditions. The  
 103 second class of models are style transfer GAN (Supplemental Note 4, Supplemental Figure 3b), which  
 104 are commonly used for unsupervised image to image translation [29, 30]. In our implementation,  
 105 such a model is directly trained for the task of transferring cells from one condition to another. The  
 106 adversarial training is highly flexible and does not require an assumption of linearity in a latent  
 107 space. In contrast to other propositions for mapping biological manifolds using GANs [31], style  
 108 transfer GANs are able to handle unpaired data, a necessity for their applicability to single-cell  
 109 RNA-seq data. We also mention that we tested ordinary GANs combined with vector arithmetics  
 110 similar to Ghahramani *et al.* [16]. However, for the fundamental problems outlined above, we were  
 111 not able to produce any meaningful out-of-sample predictions using this setup. In addition to the  
 112 non-linear generative models, we tested simpler linear approaches based on vector arithmetics in



113 gene expression space and the latent space of principal component analyses (PCA).

114 Applying the competing models to the PBMC dataset, we observe that all other models fail to  
115 predict mean and variance of the distribution of *ISG15* (all genes in Supplemental Figure 2), in  
116 stark contrast to scGen’s performance (Figure 2e). CVAE and style transfer GANs predictions are  
117 vaguely correlated with ground truth values and linear models also yield incorrect negative values  
118 (Supplemental Figure 2b-d). However, as shown in Figure 2b scGen provides most faithful prediction  
119 to real CD4-T cells and outperforms all other potential models (Figure 2f, Supplemental Figure 2,  
120 Supplemental Note 5).

121 A likely reason for why CVAE fails to provide meaningful out-of-sample predictions, is that it  
122 disentangles perturbation information from the latent space. Hence, the model does not learn non-  
123 trivial patterns linking perturbation to cell type. A likely reason for that the style transfer GAN  
124 is incapable for achieving the task is it’s attempt of matching two high-dimensional distributions,  
125 with much more complex models involved than in the case of scGen. While notoriously more  
126 difficult to train. Some of these arguments can be better understood when inspecting the latent  
127 space distribution embeddings of the generative models. As the CVAE completely strips off all  
128 perturbation-variation, its latent space embedding does not allow to distinguish perturbed from  
129 unperturbed cells (Supplemental Figure 4a). In contrast to CVAE representations, the scGen (VAE)  
130 latent space representation captures both information for condition and cell type (Supplemental  
131 Figure 4c), reflecting that non-trivial patterns across condition and cell type variability have been  
132 learned.

### 133 **scGen predicts both response shared among cell types and cell type specific response**

134 Depending on shared or individual receptors, signaling pathways and regulatory networks, a group of  
135 cells perturbation response may result in expression-level changes that are shared across all cell types  
136 or unique to only some. Inferring both types of responses is essential for understanding mechanisms  
137 involved in disease progression as well as adequate drug dose predictions [32, 33]. Here, we show  
138 that scGen is able to capture both shared and cell type specific response after stimulation by IFN- $\beta$   
139 when any of the cell types in the data is held out during training and subsequently predicted (Figure  
140 2g). For this, we use previously reported marker genes [23] of three different kinds: cell type specific  
141 markers independent of the perturbation such as *CD79A* for B cells, perturbation-response specific  
142 genes like *ISG15*, *IFI6*, *IFIT1* expressed in all cell types, and genes of cell type specific responses to  
143 the perturbation such as *APOBEC3A* in for DC cells. Across the seven different held out perturbed  
144 cell types present in the data of Kang *et al.*, scGen consistently makes good predictions not only of  
145 unperturbed and shared perturbation effects but also for cell type specific ones. Hence, although  
146 scGen encodes perturbation response by a shared  $\delta$  across all cells in the latent space, after decoding  
147 to expression space both shared and individual changes can be captured.

### 148 **scGen robustly predicts intestinal epithelial cells response to infection**

149 To illustrate that scGen works robustly, we evaluate its prediction performance quantitatively in  
150 two datasets from Haber *et al.* [4] related to epithelial cells from the small intestine (Supplemental  
151 Note 2) using the same network architecture as for the data of Kang *et al.*. These datasets consist of  
152 intestinal epithelial cells after *Salmonella* or *Heligmosomoides polygyrus* (*H.poly*) infections, respec-  
153 tively. scGen shows good performance for early transit-amplifying (TA.early) cells after infection  
154 with *H.poly* and *Salmonella* (Figure 3a,b), predicting both up and downregulated genes for each  
155 condition with high precision ( $R^2 = 0.98$  and  $R^2 = 0.98$ , respectively). Figure 3c,d depicts similar  
156 analyses for both datasets and all occurring cell types — as before, the predicted ones being held  
157 out during training — indicating that scGen’s prediction accuracy is robust across most cell types.  
158 scGen’s performance is by far poorest for Tuft and Endocrine cells (Figure 3c,d). Whereas these  
159 cells, in reality, show a much weaker response than all other cells in the dataset, scGen predicts them  
160 as essentially non-responding (see Supplemental Figure 5). Hence, while scGen fails to capture the  
161 response quantitatively, it is remarkable that it captures the qualitative trend of the much weaker  
162 response despite not having seen this phenomenon for a high number of cells during training — both

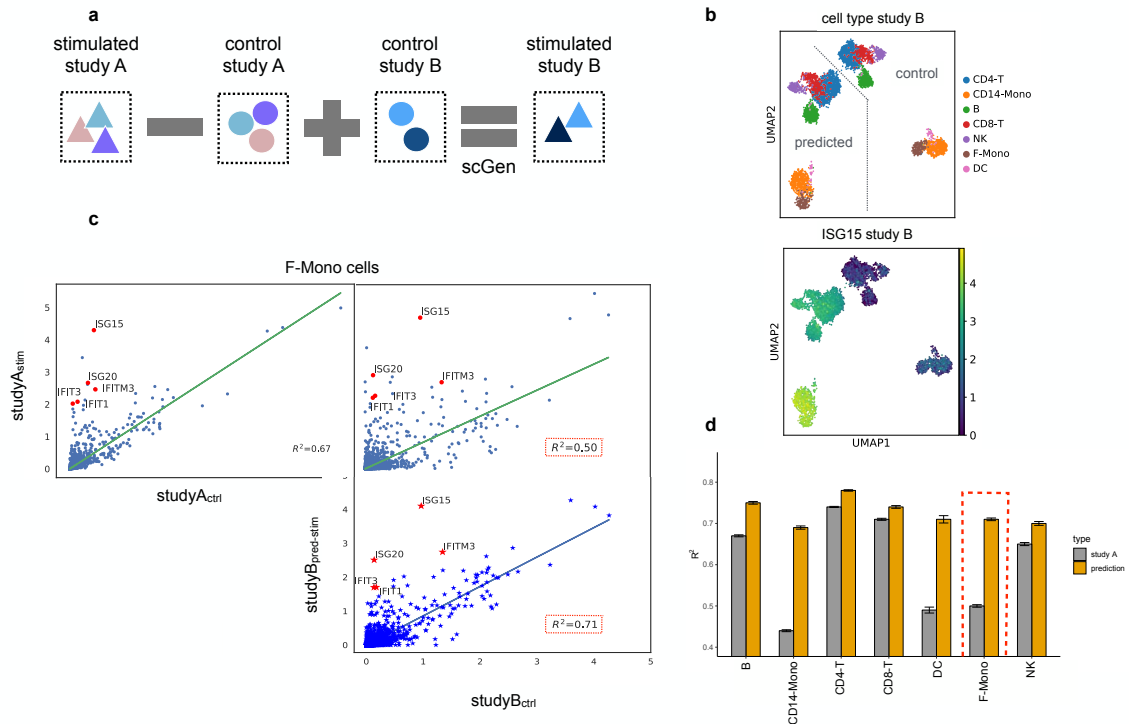

**Figure 4 | scGen accurately predicts single cell perturbation across different studies.** **a**, scGen can be used to translate the effect of stimulation trained in study A to how stimulated cells in study B would look like, given a control sample set. **b**, Cell types for control and predicted stimulated cells for study B (Zheng *et al.* [34]) in two conditions where ISG15, the top IFN- $\beta$  response gene, is only expressed in stimulated cells. **c**, Average expression between: control and stimulated F-Mono cells from study A (upper left), control from study B and stimulated cells from study A (upper right) and control from study B and predicted stimulated cells for study B (lower right). Red points denote top five differentially expressed genes for F-Mono cells after stimulation in study A. **d**, Comparison of  $R^2$  values highlighted in panel c for F-Mono and all other cell types.

163 Endocrine and Tuft cells only constitute a small fraction of the data.

164 In order to further understand when scGen starts to fail to make meaningful predictions, we again  
 165 trained it on the PBMC data of Kang *et al.*, but now with more than one cell type held out.  
 166 This study shows that scGen's predictions are robust when holding out several dissimilar cell types  
 167 (Supplemental Figure 6a-b) but start failing when training on data that only contains information  
 168 about the response of one highly dissimilar cell type (see CD4-T predictions in Supplemental Figure  
 169 6c).

170 Finally, similar to what has been shown by [16] for differentiation of epidermal cells, we cannot only  
 171 generate fully responding cell populations, but also intermediary cell states between two conditions.  
 172 Here, we do so for the IFN- $\beta$  stimulation and the *Salmonella* infection (Supplemental Note 6,  
 173 Supplemental Figure 7).

#### 174 scGen enables cross-study predictions

175 We showed that scGen predicts cells from a cell type in a specific biological condition using all other  
 176 cells available in that study. In order to be applicable to broad cell atlases such as the Human Cell  
 177 Atlas [35], the algorithm ought to be robust against batch effects and hence generalize its prediction  
 178 to unperturbed cells measured in a different study. For this, we consider a scenario with two single  
 179 cell studies: study A, where cells within a specific organ have been observed in two biological

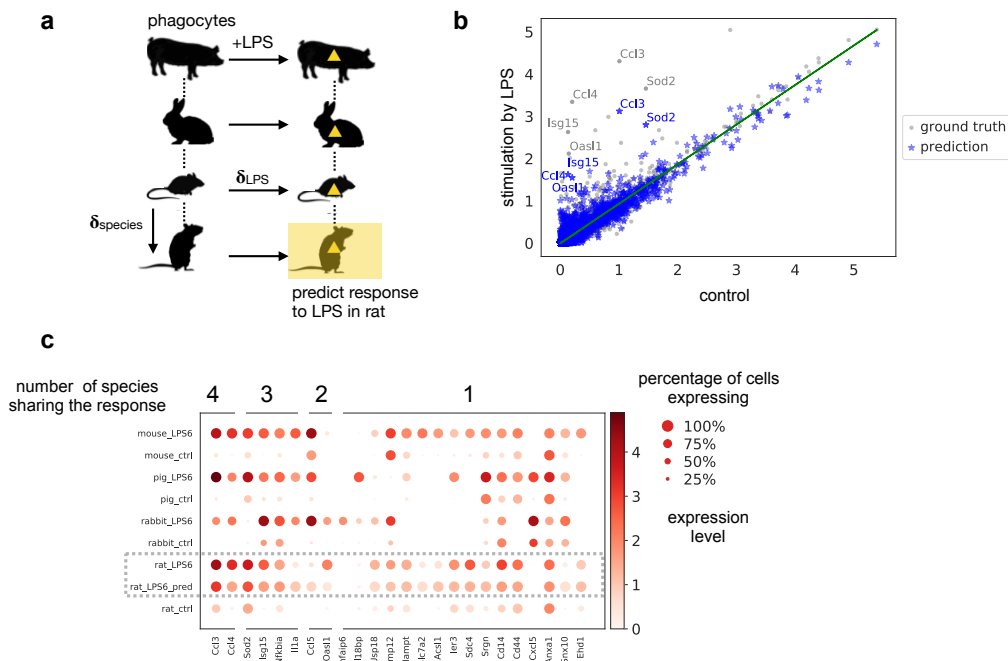

**Figure 5 | scGen predicts single cell perturbation response across different species.** **a**, Prediction of unseen rat LPS phagocytes while accounting for both stimulation and species effect by learning two different vectors for each, on control and stimulated scRNA-seq from mouse, rabbit and pig by Hagai *et al.* [5]. **b**, Mean gene expression of 6,619 one-to-one orthologs between species for control rat cells plotted against true and predicted LPS while highlighted points represent top 5 differentially expressed genes after LPS stimulation in the real data. **c**, Dot plot of top 10 differentially expressed genes after LPS stimulation in each species, with numbers indicating how many species have those responsive genes among their top 10 differentially expressed genes.

180 conditions, e.g., control and stimulation, and study B with the same setting as study A but only in  
 181 the control condition. By jointly encoding the two datasets, scGen provides a model for predicting  
 182 the perturbation for study B (Figure 4a) by estimating the study effect as the linear perturbation  
 183 in the latent space. To demonstrate this, we use as study A the PBMC dataset from Kang *et al.*  
 184 and as study B another PBMC study consisting of 2623 cells that are available only in the control  
 185 condition (Zheng *et al.* [34]). After training the model on data from study A, we use the trained  
 186 model to predict how the PBMCs in study B would respond to stimulation with IFN- $\beta$ .

187 As a first sanity check, we show that *ISG15* is also expressed in the prediction of stimulated cells  
 188 based on the Zheng *et al.* (Figure 4b). This observation holds for all other differential genes  
 189 associated with the stimulation, which we show for *FCGR3A*+-Monocytes (F-Mono) (Figure 4c):  
 190 The predicted stimulated F-Mono cells correlate more strongly with the control cells in their study  
 191 than with stimulated cells from study A while still expressing differentially expressed genes known  
 192 from study A. Similarly, predictions for other cell types yield a higher correlation than the direct  
 193 comparison with study A (Figure 4d).

#### 194 scGen predicts single-cell perturbation across species

195 In addition to learning the variation between two conditions, e.g. health and disease for a species,  
 196 scGen can be used to predict across species. We trained a model on single cell RNA-seq dataset by  
 197 Hagai *et al.* [5] comprised of bone marrow-derived mononuclear phagocytes from mouse, rat, rabbit,  
 198 and pig perturbed with lipopolysaccharide (LPS) after six hours. Similar to what we did previously,  
 199 we held out the rat LPS cells from the training data.

200 In contrast to previous scenarios, now, two global axes of variation exist in the latent space associated  
 201 with species and stimulation, respectively.

202 Based on this, we have two latent difference vectors:  $\delta_{LPS}$ , which encodes the variation between

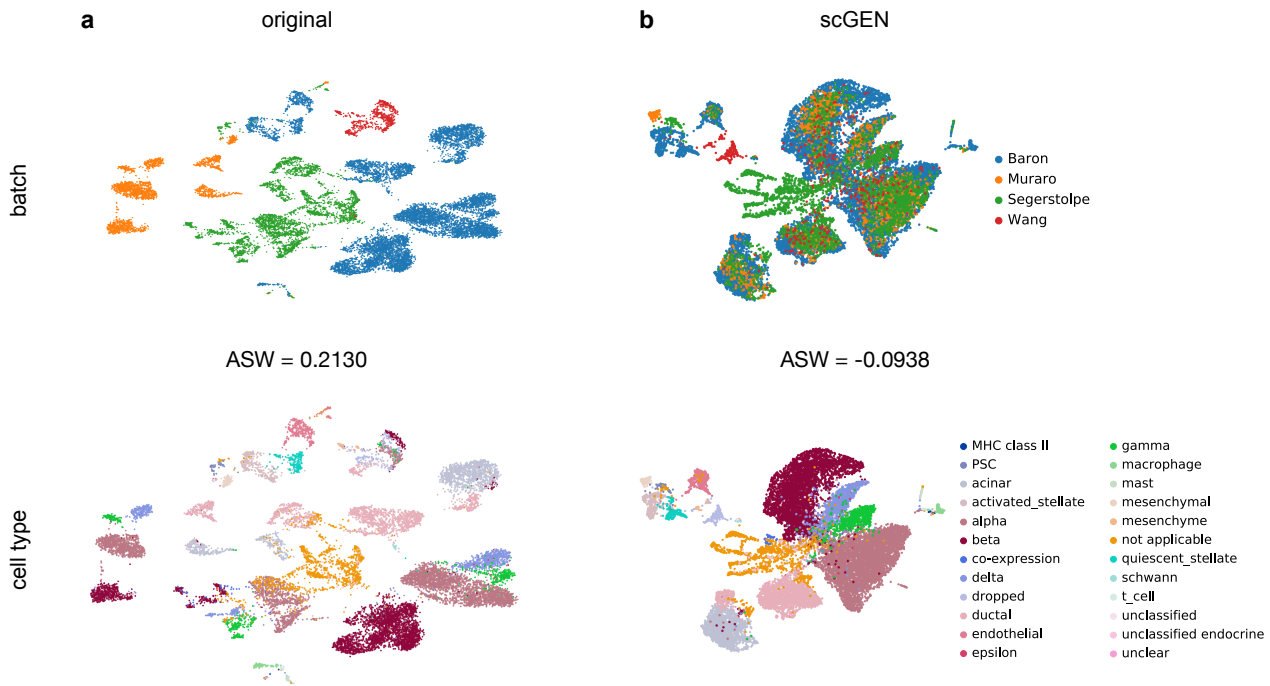

**Figure 6 | scGen removes batch effects.** **a**, UMAP visualization of 4 technically diverse pancreatic datasets with their corresponding batch and cell types. We report average silhouette width (ASW) for batches in the original data (ASW = 0.2130, lower is better for batch effect evaluation). **b**, Data corrected by scGen mixes shared cell types from different studies while preserving study specific cell types independent (ASW = -0.0938).

203 control and LPS cells, and  $\delta_{species}$ , which accounts for differences between species. Next, we predict  
 204 rat LPS cells using  $z_{i, rat, LPS} = \frac{1}{2}(z_{i, mouse, LPS} + \delta_{species} + z_{i, rat, control} + \delta_{LPS})$ . This equation takes an  
 205 average of the two alternative ways of reaching rat LPS cells (Figure 5a). Figure 5(b) illustrates  
 206 that predicted LPS cells express similar differential genes as true LPS stimulated rat cells. All other  
 207 predictions along the major linear axes of variation also yield plausible results for stimulated rat  
 208 cells (Supplemental Figure 8).

209 In addition to the species-conserved response of a few upregulated genes, e.g. *Ccl3* and *Ccl4*, cells  
 210 also display species specific responses. For example, *Il1a* is highly upregulated in all species except  
 211 rat. Strikingly, scGen correctly identifies the rat cells as non-responding with this gene. Only the  
 212 fraction of cells expressing *Il1a* increases at a low expression level (Figure 5c). Based on these early  
 213 demonstrations, we foresee the prediction of human cell response based on data from healthy human  
 214 and different healthy and perturbed animal models.

### 215 scGen removes batch effects

216 Let us now show that scGen is able to efficiently correct for batch effects. To evaluate scGen's batch  
 217 correction capability, we merged four pancreatic datasets [36–39] (Figure 6a). We train scGen on  
 218 these data and define a source and destination batch and compute a difference vector  $\delta_{batch}$  between  
 219 the source and the destination batch. To remove the batch effects from the destination batch, we  
 220 add the learned  $\delta_{batch}$  to the latent representation of the cells in the destination batch (Figure 6b).  
 221 Using the cell type labels from the studies we observe a homogeneous overlap. A comparison with  
 222 four existing batch removal methods (Supplemental Figure 9) shows that scGen performs as well  
 223 as the other methods [23, 40–42]. To further evaluate batch removal ability of our model on a  
 224 larger dataset, we merged eight different mouse single cell atlases comprised of 114600 cells from  
 225 different organs [43–50]. As expected, the homogeneity of the data increased after batch correction  
 226 (Supplemental Figure 10).

## 227 Discussion

228 We presented scGen, a model for predicting perturbation response of single cells based on generative  
229 neural networks and latent-space vector arithmetic. By adequately encoding the original expression  
230 space in a latent space, we achieve simple, near-to-linear mappings for highly non-linear sources  
231 of variation in the original data, which explain a large portion of the variability in the data. We  
232 provided examples for variation due to perturbation, species or batch. This allows to use scGen in  
233 several contexts including perturbation prediction response for unseen phenomena across cell types,  
234 study and species, for interpolating cells between conditions and for batch effect removal.

235 While we showed proof-of-concept for *in silico* predictions of cell type and species specific cellular  
236 response, in the present work, scGen has been trained on relatively small datasets, which only reflect  
237 subsets of biological and transcriptional variability. While we demonstrated scGen's predictive power  
238 in these settings, a trained model cannot be expected to be predictive beyond the domain of the  
239 training data. To gain confidence in predictions, one needs to make realistic estimates for prediction  
240 errors by holding out parts of the data with known ground truth that are representative for the  
241 task. It is important to realize that such a procedure arises naturally when applying scGen in an  
242 alternating iteration of experiments, retraining based on new data and *in silico* prediction. By design,  
243 such strategies are expected to yield highly performing models for specific systems and perturbations  
244 of interest. It is evident that such strategies could readily exploit the upcoming availability of large-  
245 scale atlases of organs in healthy state, such as the Human Cell Atlas [35].

246 In summary, we demonstrated that scGen is able to learn cell type and species specific response.  
247 To be able to do so, the model needs to capture features that distinguish weakly from strongly  
248 responding genes and cells. Building biological interpretations of these features, for instance, along  
249 the lines of Ghahramani *et al.* [16] or Way and Greene [51], could help in understanding the differences  
250 between cells that respond to certain drugs and cells that do not respond, which is often crucial for  
251 understanding patient response to drugs [52].

## 252 Code availability

253 Code is available from <https://github.com/theislab/scGen>.

## 254 Data availability

255 All data is available from the original publications and linked on [https://github.com/theislab/](https://github.com/theislab/scGen)  
256 [scGen](https://github.com/theislab/scGen).



## 257 **Author Contributions**

258 M.L. performed the research, implemented the models and analyzed the data. F.A.W. conceived  
259 the project with contributions from M.L. and F.J.T.. F.A.W. and F.J.T. supervised the research.  
260 All authors wrote the manuscript.

## 261 **Acknowledgments**

262 We are grateful to all members of the Theis lab, in particular, D.S. Fischer for early comments on  
263 predicting across species. M.L. is grateful for valuable feedback of L. Haghverdi regarding batch-effect  
264 removal. F.A.W. acknowledges discussions with N. Stranski on responding and non-responding cells  
265 and support by the Helmholtz Postdoc Programme, Initiative and Networking Fund of the Helmholtz  
266 Association. F.J.T. gratefully acknowledges support by the Helmholtz Association within the project  
267 “Sparse2Big” and by the German Research Foundation (DFG) within the Collaborative Research  
268 Centre 1243, Subproject A17.

269 During the work on the project, we became aware of reference [51], which suggests to study differences  
270 between cancer subtypes in the latent space of a VAE trained on bulk RNA-seq data from the Cancer  
271 Genome Atlas. The authors also demonstrate biological interpretability of these differences. In the  
272 weeks before submission of the manuscript, we became aware of the preprint [53], which addresses  
273 out-of-sample prediction in its revised version, but not in the context of single cell RNA-seq data.

## 274 Supplemental Notes

### 275 Contents

|     |                                              |           |
|-----|----------------------------------------------|-----------|
| 276 | <b>1 Models and theoretical background</b>   | <b>11</b> |
| 277 | 1.1 Variational autoencoders . . . . .       | 11        |
| 278 | 1.2 Linearity of the latent space . . . . .  | 12        |
| 279 | 1.3 $\delta$ vector estimation . . . . .     | 13        |
| 280 | <b>2 Datasets</b>                            | <b>13</b> |
| 281 | <b>3 Conditional variational autoencoder</b> | <b>16</b> |
| 282 | <b>4 Style transfer GAN</b>                  | <b>16</b> |
| 283 | <b>5 Model comparison</b>                    | <b>17</b> |
| 284 | <b>6 Latent space interpolation</b>          | <b>17</b> |
| 285 | <b>7 Training and technical details</b>      | <b>18</b> |
| 286 | <b>8 Evaluations</b>                         | <b>19</b> |

### 287 Supplemental Note 1: Models and theoretical background

#### 288 Supplemental Note 1.1: Variational autoencoders

289 A variational autoencoder is a neural network consisting of an encoder and a decoder similar to  
290 classical autoencoders. Unlike the classical autoencoders, VAEs are able to generate new data  
291 points. The mathematics behind VAEs is not similar to classical autoencoders. The difference is  
292 that the model maximizes the likelihood of each sample  $x_i$  in the training set under a generative  
293 process as formulated in Equation (1).

$$P(x_i|\theta) = \int P(x_i|z_i; \theta)P(z_i|\theta)dz_i. \quad (1)$$

294 where  $\theta$  is the model parameter which in our model corresponds to a neural network with its learnable  
295 parameters and  $z_i$  is a latent variable. The most important idea of a VAE is to sample latent  
296 variables  $z_i$  that are likely to produce  $x_i$  and using those to compute  $P(x_i|\theta)$  [54]. We approximate  
297 the posterior distribution  $P(z_i|x_i, \theta)$  using the variational distribution  $Q(z_i|x_i, \phi)$  which is modeled  
298 by a neural network with parameter  $\phi$ , called the inference network (the encoder). Next, we need a  
299 distance measure between the true posterior  $P(z_i|x_i, \theta)$  and the variational distribution. To compute  
300 such a distance we use the Kullback-Leibler (KL) divergence between  $Q(z_i|x_i, \phi)$  and  $P(z_i|x_i, \theta)$ ,  
301 which yields:

$$\mathbb{KL}(Q(z_i|x_i, \phi)||P(z_i|x_i, \theta)) = \mathbb{E}_{Q(z_i|x_i, \phi)}[\log Q(z_i|x_i, \phi) - \log P(z_i|x_i, \theta)]. \quad (2)$$

302 Now, we can derive both  $P(x_i|\theta)$  and  $P(x_i|z_i, \theta)$  by applying Bayes rule to  $P(z_i|x_i, \theta)$  which results  
303 in:

$$\mathbb{KL}(Q(z_i|x_i, \phi)||P(z_i|x_i, \theta)) = \mathbb{E}_{Q(z_i|x_i, \phi)}[\log Q(z_i|x_i, \phi) - \log P(z_i|\theta) - \log P(x_i|z_i, \theta)] + \log P(x_i|\theta). \quad (3)$$

304 Finally, by rearranging some terms and exploiting the definition of KL divergence we have :

$$\log P(x_i|\theta) - \mathbb{KL}(Q(z_i|x_i, \phi)||P(z_i|x_i, \theta)) = \mathbb{E}_{Q(z_i|x_i, \phi)}[\log P(x_i|z_i, \theta)] - \mathbb{KL}[Q(z_i|x_i, \phi)||P(z_i|\theta)]. \quad (4)$$

305 On the left hand side of Equation (4), we have the log-likelihood of the data denoted by  $\log P(x_i|\theta)$   
306 and an error term which depends on the capacity of the model. This term ensures that  $Q$  is  
307 as complex as  $P$  and assuming a high capacity model for  $Q(z_i|x_i, \phi)$ , this term will be zero [54].  
308 Therefore, we will directly optimize  $\log P(x_i|\theta)$  :

$$\mathbb{E}_{Q(z_i|x_i, \phi)}[\log P(x_i|z_i, \theta)] - \mathbb{KL}[Q(z_i|x_i, \phi)||P(z_i|\theta)]. \quad (5)$$

309 In order to maximize the Equation (5), we choose the variational distribution  $Q(z_i|x_i, \phi)$  to be a  
310 multivariate Gaussian  $Q(z_i|x_i) = \mathcal{N}(z_i; \mu_\phi(x_i), \Sigma_\phi(x_i))$  where  $\mu_\phi$  and  $\Sigma_\phi$  are implemented with the  
311 encoder neural network and  $\Sigma_\phi$  is constrained to be a diagonal matrix. The  $\mathbb{KL}$  term in Equation  
312 (5) can be computed analytically since both both prior ( $P(z_i|\theta)$ ) and posterior ( $Q(z_i|x_i, \phi)$ ) are  
313 multivariate Gaussian distributions. The integration for the first term in (5) has no closed-form and  
314 we need Monte Carlo integration to estimate it. We can sample  $Q(z_i|x_i, \phi)$   $L$  times and directly  
315 use stochastic gradient descent to optimize Equation (6) as loss function for every training point  $x_i$   
316 from dataset  $D$  :

$$Loss(x_i) = \frac{1}{L} \sum_{l=1}^L \log P(x_i|z_{i,l}, \theta) - \mathbb{KL}[Q(z_i|x_i, \phi)||P(z_i|\theta)]. \quad (6)$$

317 However, the first term in Equation (6) only depends on the the parameters of  $P$  and the parameters  
318 of variational distribution  $Q$  are not there. Therefore, it has no gradient with respect to  $\phi$  to be  
319 back-propagated. In order to address this, the *reparameterization trick* [19] has been proposed. This  
320 trick works by first sampling from  $\epsilon \sim \mathcal{N}(0, I)$  and then computing  $z_i = \mu_\phi(x_i) + \Sigma_\phi^{\frac{1}{2}}(x_i) \times \epsilon$ . In  
321 consequence, we can use gradient-based algorithms to optimize Equation (6).

322 For the results shown in the present paper, we adapted the cost function (6) of the VAE by  
323 replacing  $\mu(x_i)^2$  with  $(\log \Sigma(x_i))^2$  in the regularization ( $\mathbb{KL}$ ) term.

## 324 Supplemental Note 1.2: Linearity of the latent space

325 scGen exploits vector arithmetics in the latent space of VAEs which assumes the shift (response)  
326 induced by stimuli can be modeled linearly. Similar to what has been shown by [55], we empirically  
327 demonstrate the linearity of the latent space with respect to biological conditions. In pursuance of  
328 that, we design a simple linear classifier based on the difference vector ( $\delta$ ) between two conditions  
329 in the latent space. We hypothesize that the  $\delta$  vector directs toward a direction in the latent space  
330 where condition 1 increases. Therefore, by moving along the direction of  $\delta$  we are moving from the  
331 condition 0 to condition 1. A high-level intuition for this is the difference vector manipulates cells by  
332 adding and removing information to them. Suppose, for example, a dimension of the latent vector  
333 corresponds to the degree of the infection in a cell. Increasing that attribute would be as easy as  
334 adding the  $\delta$  vector corresponding for that attribute. In consequence, the dot product of the cells  
335 from the condition 1 with  $\delta$  will be approximately greater than zero (or a constant positive value)  
336 indicating high similarity. Similarly, the dot product with cells in condition 0 would yield negative  
337 values showing low similarity (Supplemental Figure 1a). After finding the difference vector for each  
338 condition, including IFN- $\beta$  from Kang *et al.* [3], *H.poly* and *Salmonella* infections from Haber *et al.*  
339 [4], we demonstrate the histogram of dot product results for the latent representation of all cells  
340 with their corresponding difference vector (Supplemental Figure 1b).

341 We did another test by calculating  $\delta_{\text{stim-k}}$  denoting the difference between stimulated and control  
342 cells for cell type  $k$ . We also calculated another set of difference vectors,  $\delta_{\text{celltype-ij}}$ , representing  
343 the difference between each of the seven cell types present in Kang *et al.* dataset irrespective of

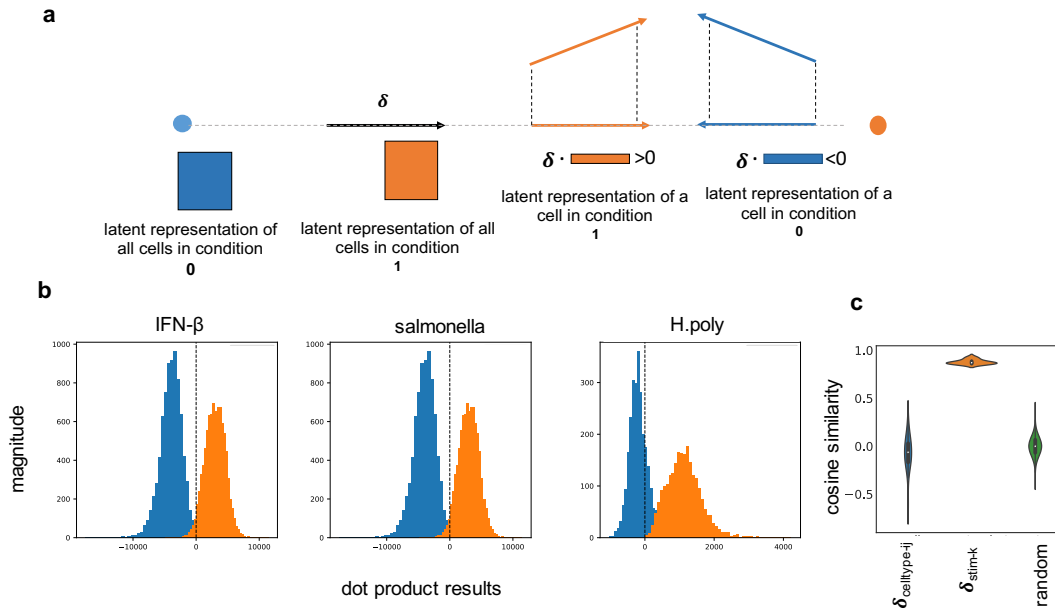

**Supplemental Figure 1 | Linearity of the latent space.** **a**, Building a linear classifier based on the dot product between the difference vector ( $\delta$ ) and the latent representation of each cell. **b**, Dot product results between latent representation of all cells with their corresponding difference vector ( $\delta$ ) for each condition shows that two conditions are approximately linearly separable using dot product classifier. **c**, Cosine similarity of  $\delta_{\text{stim-k}}$ ,  $\delta_{\text{celltype-ij}}$  with  $\delta$  where  $\delta_{\text{celltype-ij}} = \text{avg}(z_{\text{celltype}=i}) - \text{avg}(z_{\text{celltype}=j})$  and  $\delta_{\text{stim-k}} = \text{avg}(z_{\text{stim, celltype}=k}) - \text{avg}(z_{\text{ctrl, celltype}=k})$  for all seven cell types present in Kang *et al.* dataset ( $z$  denotes the latent representation of all cells with the corresponding label). The third violin plot shows pairwise cosine similarity for a set of 1000 random samples from 100 dimensional standard normal distribution.

344 their condition. Next, we calculated the cosine similarity for each set of previous vectors with  $\delta$ .  
 345 Supplemental Figure 1c depicts that vector in  $\delta_{\text{stim-k}}$  set have very high cosine similarity with  $\delta$   
 346 showing that they are both directing toward the same direction with a small angle. However, most  
 347 of the  $\delta_{\text{celltype-ij}}$  vectors have cosine similarity close to zero that shows the cell type and condition  
 348 vectors are different and nearly orthogonal. In order to get an intuition of how unlikely is to get a  
 349 high cosine similarity in 100-dimensional vector space, we randomly drew 1000 samples from 100-  
 350 dimensional standard normal distribution and calculated pair-wise cosine similarity between them  
 351 (Supplemental Figure 1c, random).

### 352 Supplemental Note 1.3: $\delta$ vector estimation

353 In order to estimate  $\delta$ , first, we extract all cells for each condition. Next, for each cell type, we  
 354 up-sample the cell type sizes to be equal to the maximum cell type size in that condition. To further  
 355 remove the population size bias, we randomly down-sample the condition with a higher sample size  
 356 to match the sample size of the other the condition. Finally, we estimate the difference vector by  
 357 calculating  $\delta = \text{avg}(z_{\text{condition}=1}) - \text{avg}(z_{\text{condition}=0})$ , where  $z_{\text{condition}=1}$  and  $z_{\text{condition}=0}$  denote the  
 358 latent representation of cells in each condition, respectively.

### 359 Supplemental Note 2: Datasets

360 The First dataset includes two groups of peripheral blood mononuclear cells (PBMCs) from Kang  
 361 *et al.* [3]. The original dataset includes 29065 cells split into 14446 stimulated and 14619 control

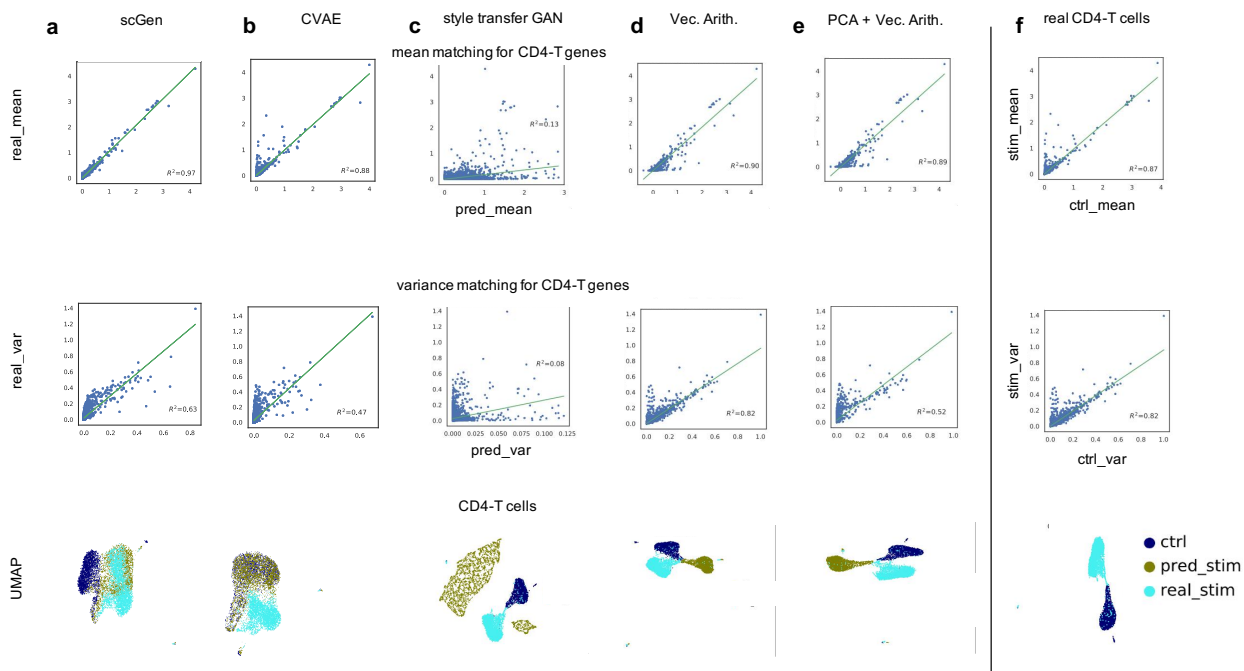

**Supplemental Figure 2 | Distribution matching comparison between different models.** a-e, Mean and variance matching comparison between scGen and four alternative models for CD4-T cells, shows scGen outperforms other models. Similarly, by comparing UMAP visualizations one can see predictions by scGen have more overlap with ground truth cells whereas predictions from other models lie far from real stimulated cells. f, Ground truth mean and variance between control and stimulated CD4-T cells.

362 cells from 8 individuals. We annotated cell types by extracting an average of top 20 cluster genes  
 363 from each of 8 identified cell types in PMBCs from [34]. Next, the Spearman correlation between  
 364 every single cell and all 8 cluster averages was calculated and each cell was assigned to the cell type  
 365 which it had a maximum correlation (similar to [3]). After identifying cell types, Megakaryocyte  
 366 cells were removed from the dataset due to the high uncertainty of assigned labels. Next, the dataset  
 367 was filtered for cells with minimum 500 expressed genes and genes which were expressed at least in  
 368 5 cells. Moreover, we normalized counts per-cell and top 6998 differentially expressed genes were  
 369 selected. Finally, we log-transformed the data in order to have a smoother training procedure.

370 The second dataset comprises of epithelial response to pathogen infection from Haber *et al.* [4].  
 371 In this dataset, the response of intestinal epithelial cells to *Salmonella* and parasitic helminth *He-*  
 372 *ligmosomoides polygyrus* (*H.poly*) were investigated. Moreover, it includes three different conditions  
 373 including, 1777 *Salmonella* infected cells and ten days (2,711) after *H.poly* infection and finally a  
 374 group of 3240 control cells. The data was normalized per-cell and top 7000 differentially expressed  
 375 genes were selected and finally log-transformed.

376 The second PBMC dataset from Zheng *et al.* [34] was obtained from [http://cf.10xgenomics.com/samples/cell-exp/1.1.0/pbmc3k/pbmc3k\\_filtered\\_gene\\_bc\\_matrices.tar.gz](http://cf.10xgenomics.com/samples/cell-exp/1.1.0/pbmc3k/pbmc3k_filtered_gene_bc_matrices.tar.gz). After filter-  
 377 ing cells, the data was merged with filtered PBMCs from Kang *et al.* [3]. The Megakaryocyte cells  
 378 were removed from the smaller dataset. Next, the data was normalized and then we selected top  
 379 7000 differentially expressed genes. The merged dataset was log-transformed and cells from Kang *et*  
 380



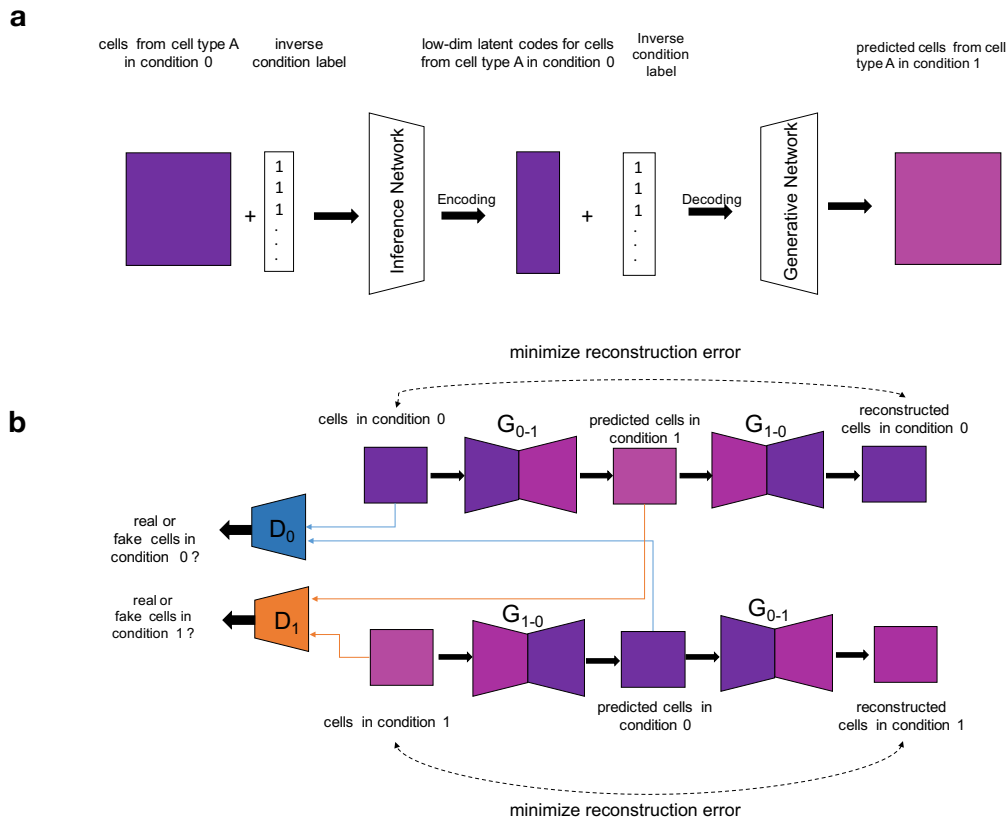

**Supplemental Figure 3 | Graphical pipeline of two alternative approaches to predict unseen single cell perturbations.** **a**, CVAE pipeline at test time to predict unseen condition. In order to predict cells in condition 1, we feed all cells present in condition 0 with inverse label 1 concatenated (shown with + symbol) to the data matrix. This informs the model that these cells are from condition 1. Therefore, the model changes the condition of input cells from 0 to 1. **b**, The style transfer GAN to transform one condition to another. This would be possible by learning a joint two-way mapping in an adversarial learning setting. There exist two generators,  $G_{0-1}$  which transforms cells from condition 0 to 1 and  $G_{1-0}$  which does the same task but in the reverse direction. Two discriminators, denoted by  $D_0$  and  $D_1$ , are trained to detect real from fake cells generated by  $G_{1-0}$  and  $G_{0-1}$ , respectively.

381 *al.* were used for training the model. The remaining 2623 cell from Zheng *et al.* were used for the  
 382 prediction.

383 Pancreatic datasets were downloaded from [ftp://ngs.sanger.ac.uk/production/teichmann/](ftp://ngs.sanger.ac.uk/production/teichmann/BBKNN/objects-pancreas.zip)  
 384 [BBKNN/objects-pancreas.zip](ftp://ngs.sanger.ac.uk/production/teichmann/BBKNN/objects-pancreas.zip). All the comparisons to other batch corrections methods were per-  
 385 formed similar to [41] with  $n = 50$  PCs. The data was already preprocessed and directly used for  
 386 training the model.

387 Mouse cell atlases were obtained from [ftp://ngs.sanger.ac.uk/production/teichmann/BBKNN/](ftp://ngs.sanger.ac.uk/production/teichmann/BBKNN/MouseAtlas.zip)  
 388 [MouseAtlas.zip](ftp://ngs.sanger.ac.uk/production/teichmann/BBKNN/MouseAtlas.zip). The data was already preprocessed and directly used for training the model.

389 LPS dataset [5] was obtained from [https://www.ebi.ac.uk/arrayexpress/experiments/E-MTAB-6754/](https://www.ebi.ac.uk/arrayexpress/experiments/E-MTAB-6754/?query=tzachi+hagai)  
 390 [?query=tzachi+hagai](https://www.ebi.ac.uk/arrayexpress/experiments/E-MTAB-6754/?query=tzachi+hagai). The data were further filtered for cells, normalized and log-transformed. We  
 391 used BiomaRt (v84) [56] to find ENSEMBL IDs of the 1-to-1 orthologs in the other three species  
 392 with the mouse. In total 6619 genes were selected from all species for training the model.

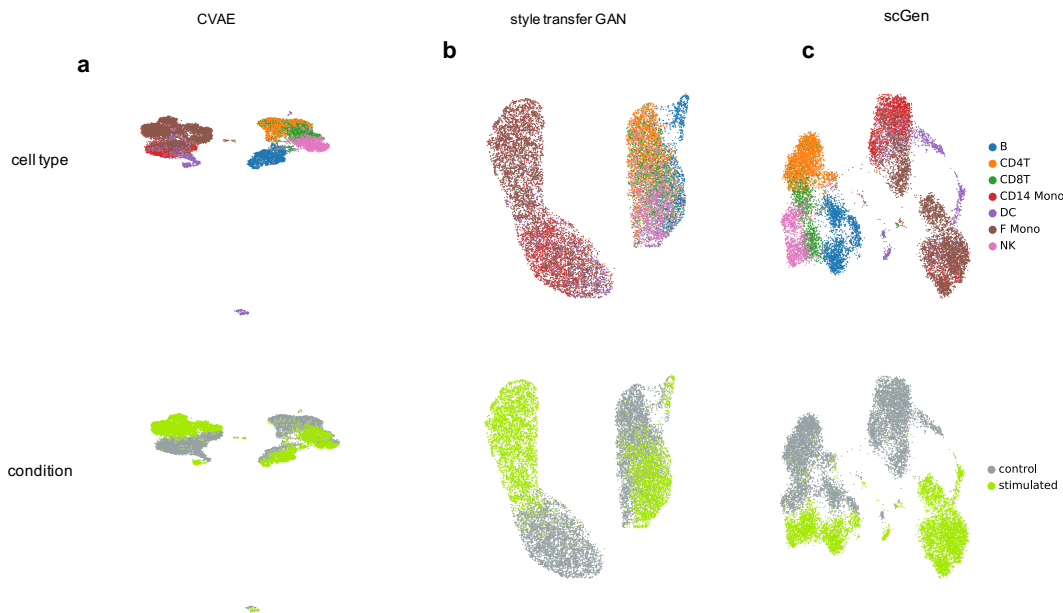

**Supplemental Figure 4 | Latent space comparison.** a-c, UMAP visualization of latent space representation for PBMCs from Kang *et al.* dataset. For scGen (VAE) and CVAE we used the bottleneck layer but for style transfer GAN we used discriminator's penultimate output as the input for UMAP algorithm.

### 393 Supplemental Note 3: Conditional variational autoencoder

394 The conditional variational autoencoder (CVAE) [28] is also based on the variational inference  
395 framework. In the CVAE setting one can train a model conditioned on two existing biological  
396 conditions. We concatenate the condition of every cell with its input ( $x_i$ ) and latent variable ( $z_i$ ).  
397 At test time, we feed the model with cells in condition 0 and the label of condition 1 (inverse label)  
398 to transform the cells to same cell type but in condition 1 (Supplemental Figure 3a).

### 399 Supplemental Note 4: Style transfer GAN

400 The original style transfer model [30] learns to transform images in one visual domain (e.g., domain  
401 of all horses) to another domain (e.g., the domain of all zebras). We can adapt this to the single cell  
402 domain by training a network that receives single cells in condition 0 and transforms them to similar  
403 cells with the same cell type but in condition 1. This can be achieved in an adversarial training  
404 fashion (Supplemental Figure 3b). As it is shown in Supplemental Figure 3b, the model transforms  
405 cells in condition 0 to cells in condition 1 via  $G_{0-1}$  and then transforms them back to condition 1  
406 using  $G_{1-0}$ . There exists a second line of networks which learns to transform cells from condition  
407 1 to 0 and reconstruct them back to condition 0. These two pipelines must work in a way that  
408 they can fool two discriminators (one for each condition) which are trained to detect real cells from  
409 generated (fake) cells. In order to make the problem setting more constrained, the reconstructions  
410 should not highly deviate from the real data according to a distance metric (e.g.,  $L_2$ ). Moreover,  
411 similar networks in both lines share parameters. At test time, one can feed the gene expression  
412 profile of all target cells in condition 0 to transform them to condition 1.

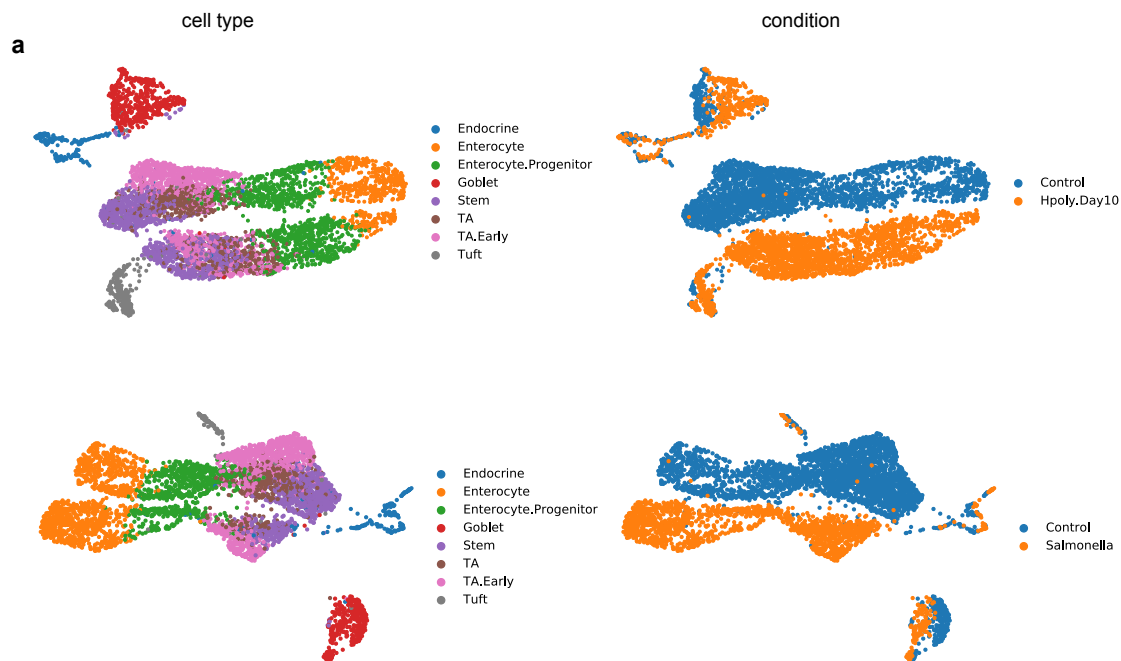

**Supplemental Figure 5 | UMAP visualization for epithelial response to pathogen infection from Haber *et al.* [4].** a, Different cell types have various degree of response after infection. In comparison with other cell types, the Endocrine and Tuft cells are less affected after infection.

### 413 Supplemental Note 5: Model comparison

414 We compare the distribution matching capability of each model based on their variance and mean  
415 estimation of every individual gene. Our model yields most accurate mean estimation ( $R^2 = 0.97$ ,  
416 Supplemental Figure 2a) while other models yield poor results. For example, CVAE completely fails  
417 to upregulate differentially expressed genes and the result is more similar to control cells ( $R^2 = 0.88$ ,  
418 Supplemental Figure 2b). Notably, applying vector arithmetics in gene expression and PCA space  
419 make the mean of some genes to take invalid negative values and leaves the variance intact as it  
420 was in the real control cells (Supplemental Figure 2d,e). Furthermore, scGen also show reasonable  
421 performance in variance estimation ( $R^2 = 0.63$ ) and outperforms all other models (Supplemental  
422 Figure 2a).

### 423 Supplemental Note 6: Latent space interpolation

424 We exemplify the latent space interpolation ability of our model by generating 2000 intermediary TA  
425 (*Salmonella*, Haber *et al.*) and CD4-T (IFN- $\beta$ , Kang *et al.*) cells. First, we project average control  
426 and predicted cells into the latent space and then linearly interpolate 2000 intermediary points  
427 between them. Next, by using generator network we map back latent intermediary cells into high-  
428 dimensional gene expression space (Supplemental Figure 7a-b). One can observe a smooth change  
429 of the top five up and downregulated *Salmonella* response genes as we traverse cell manifold from  
430 control towards *Salmonella* cells (Supplemental Figure 7c). Similarly, we can see the upregulation of

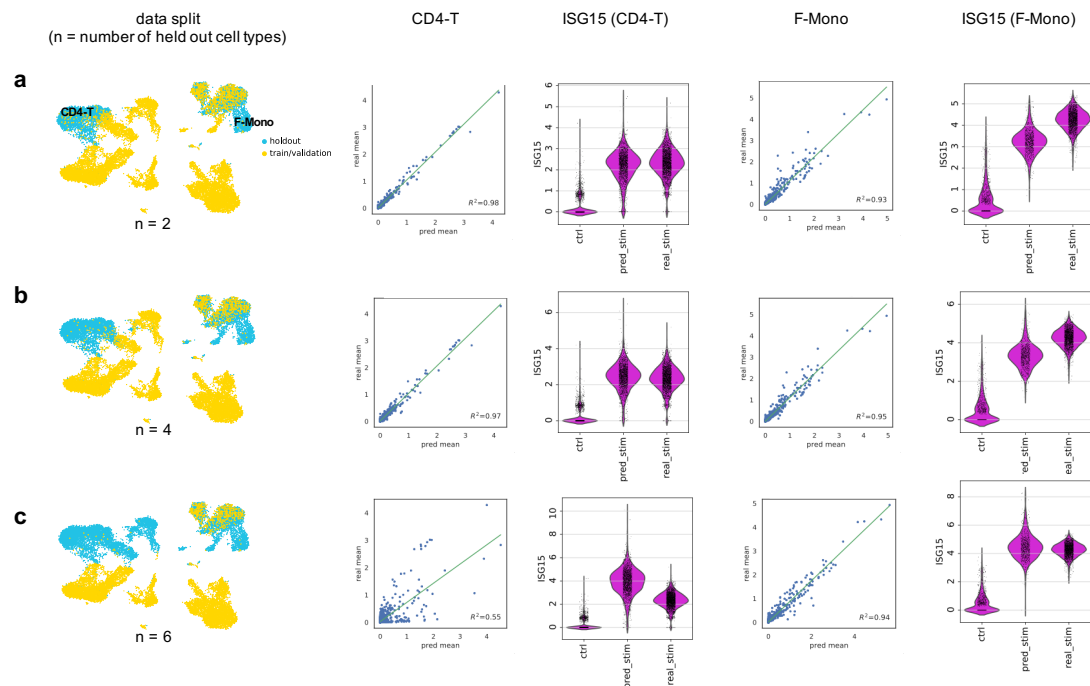

**Supplemental Figure 6 | scGen performs robustly when holding out more than one cell type.**

**a-c**, Predicting IFN- $\beta$  stimulated CD4-T and F-Mono cells from Kang *et al.* dataset in different scenarios with different number of held out cell types. First panel shows UMAP visualization for the position of held out cells. Other panels show mean gene expression of all genes and violin plot for ISG15, the top response gene after stimulation with IFN- $\beta$  for CD4-T and F-mono cells.

431 top five IFN- $\beta$  response genes (Supplemental Figure 7d).

432 **Supplemental Note 7: Training and technical details**

433 We used a similar architecture to train all models in all scenarios. This architecture includes reduc-  
 434 ing input dimension to 800 and creating another 800 features from the previous layer and finally  
 435 projecting into 100 dimensional Gaussian governed latent space ( $input_{dim} \rightarrow 800 \rightarrow 800 \rightarrow 100$ ).  
 436 The batch normalization [57] was applied to every layer except Gaussian and output layers. Leaky  
 437 ReLU (Rectified Linear Unit) activation function was used for all the layers except Gaussian and  
 438 output layers which linear and ReLU were used, Respectively. In order to avoid over-fitting, we ex-  
 439 ploited several techniques including dropout [58],  $L_2$  regularization and early-stopping. Note that,  
 440 the degree of regularization, dropout rate, and early stopping hyper-parameters are the only changes  
 441 we made to train the model on different datasets. Adam [59] optimizer with learning rate 0.001 was  
 442 used to train the networks. The detailed hyper-parameters for each dataset are listed on the GitHub  
 443 repository.

444 Usually, the conditions sizes are not equal leading to a biased  $\delta$  vector estimation. Moreover,  
 445 White [55] discovered that by removing smile vector from woman face, the male attribute was also  
 446 added. This originates from the sampling bias induced by unequal size of smiling man and woman  
 447 samples. In order to prevent a similar problem, as previously described we balanced cell type and  
 448 condition size before estimating  $\delta$ . Supplemental Figure 11 depicts the effects of using biased and  
 449 unbiased  $\delta$  vector for the prediction of stimulated CD4-T from Kang *et al.*

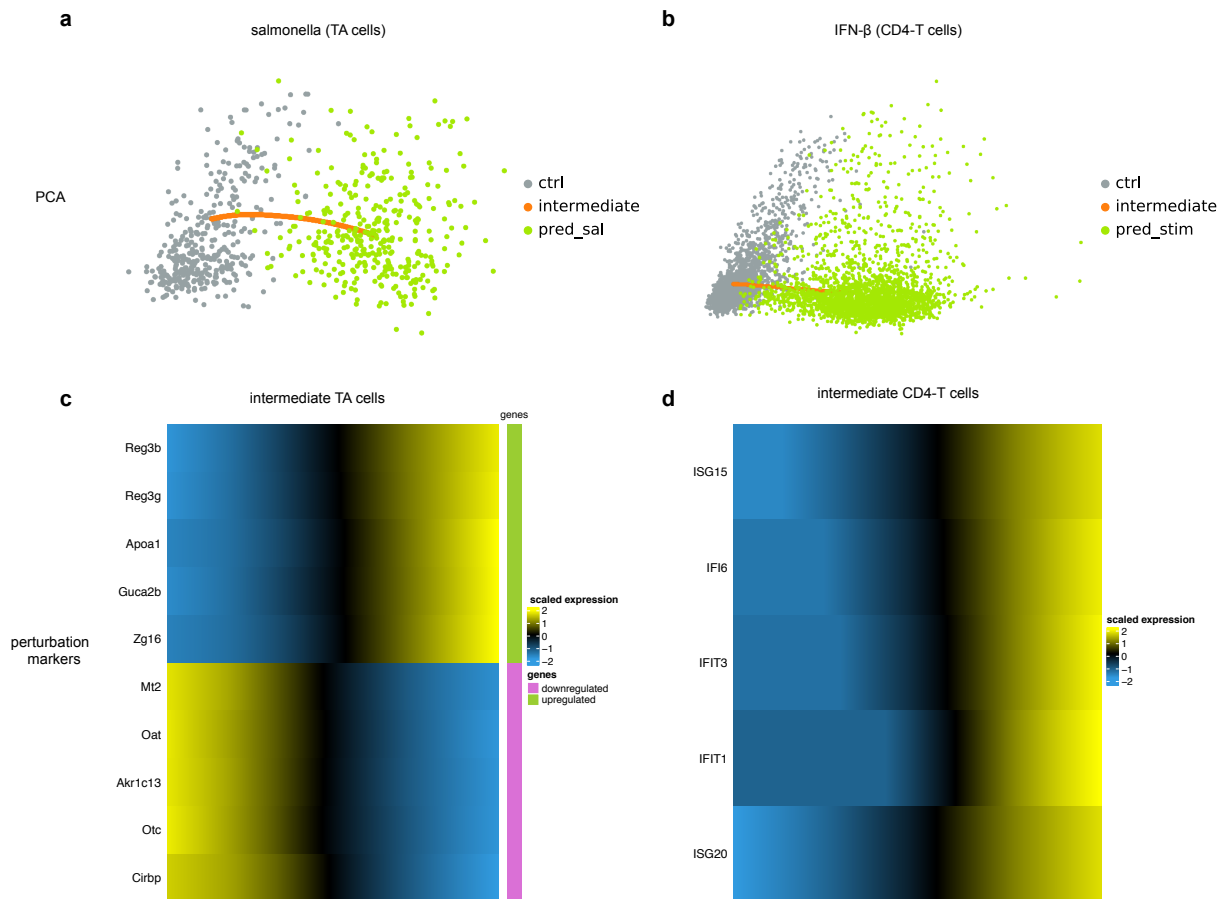

**Supplemental Figure 7 | scGen enables the generation of intermediary cells between two conditions.** **a-b**, PCA visualization of generated intermediary TA (Haber *et al.*) and CD4-T (Kang *et al.*) cells between control and predicted cells. **c**, Top five up and downregulated genes as we move from control to *Salmonella* infected cells. **d**, Similarly, variation of top five IFN- $\beta$  marker genes while transitioning from control to predicted IFN- $\beta$  stimulated cells.

## 450 Supplemental Note 8: Evaluations

451 **Silhouette width**, we calculated the Silhouette width based on the first 50 PCs of the corrected  
 452 data or the latent space of the algorithm if it did not return corrected data. The Silhouette coefficient  
 453 for for cell  $i$  is defined as:

$$454 \quad s(i) = \frac{b(i) - a(i)}{\max\{a(i), b(i)\}}$$

455 where  $a(i)$  and  $b(i)$  indicate the mean intra-cluster distance and the mean nearest-cluster distance  
 456 for sample  $i$ , respectively. Instead of cluster labels one can use batch labels to asses batch correction  
 457 methods. We used `silhouette_score` function from scikit-learn [60] to calculate the average Silhouette  
 458 width over all samples.

459 **Error bars**, were computed by re-sampling the data points with replacement for 100 times and  
 460 fitting the regression line for the re-sampled data. The interval represents the original estimation of  
 461  $R^2$  plus/minus the standard deviation of  $R^2$  values obtained from 100 fitted lines.

462 **cosine similarity**, computes the similarity as the normalized dot product of X and Y defined as:

$$463 \quad cosine\_similarity(X, Y) = \frac{\langle X, Y \rangle}{\|X\| \|Y\|}$$

464 The `cosine_similarity` function from scikit-learn was used to compute cosine similarity.



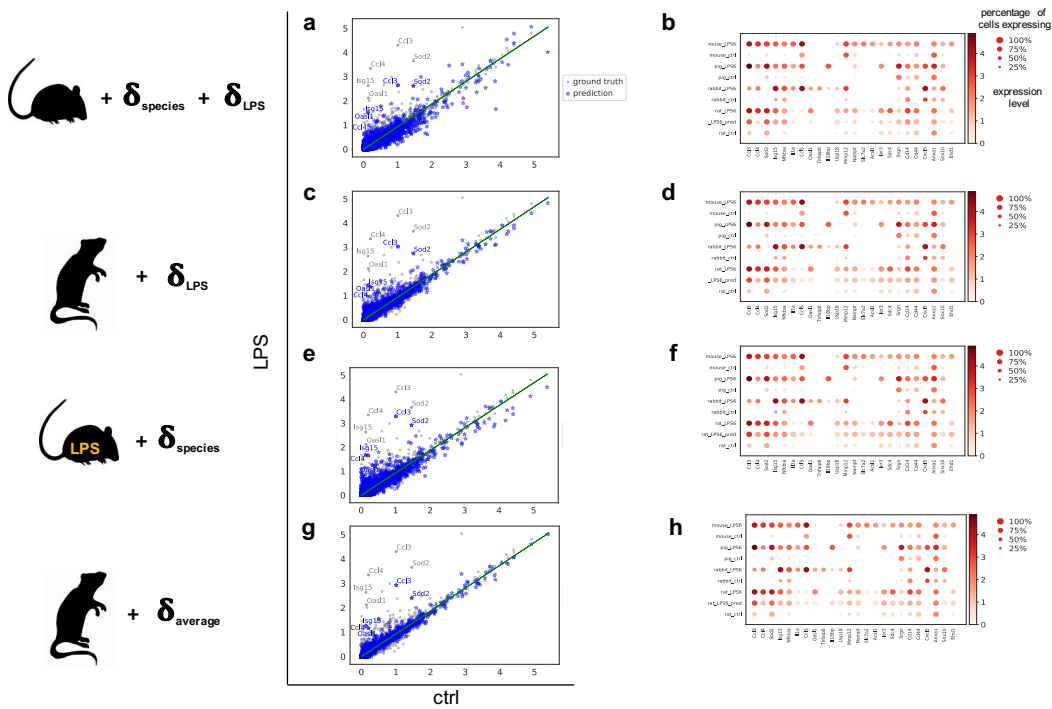

**Supplemental Figure 8 | Alternative vector arithmetics for cross species prediction. a-f,** Prediction of  $\text{rat}_{\text{LPS}}$  by adding difference vectors estimated using rat and mouse. **g-h,** Prediction of  $\text{rat}_{\text{LPS}}$  by adding  $\delta_{\text{average}}$  to  $\text{rat}_{\text{control}}$  where  $\delta_{\text{average}} = \text{avg}(z_{\text{LPS}}, \text{all species}) - \text{avg}(z_{\text{control}}, \text{all species})$ .

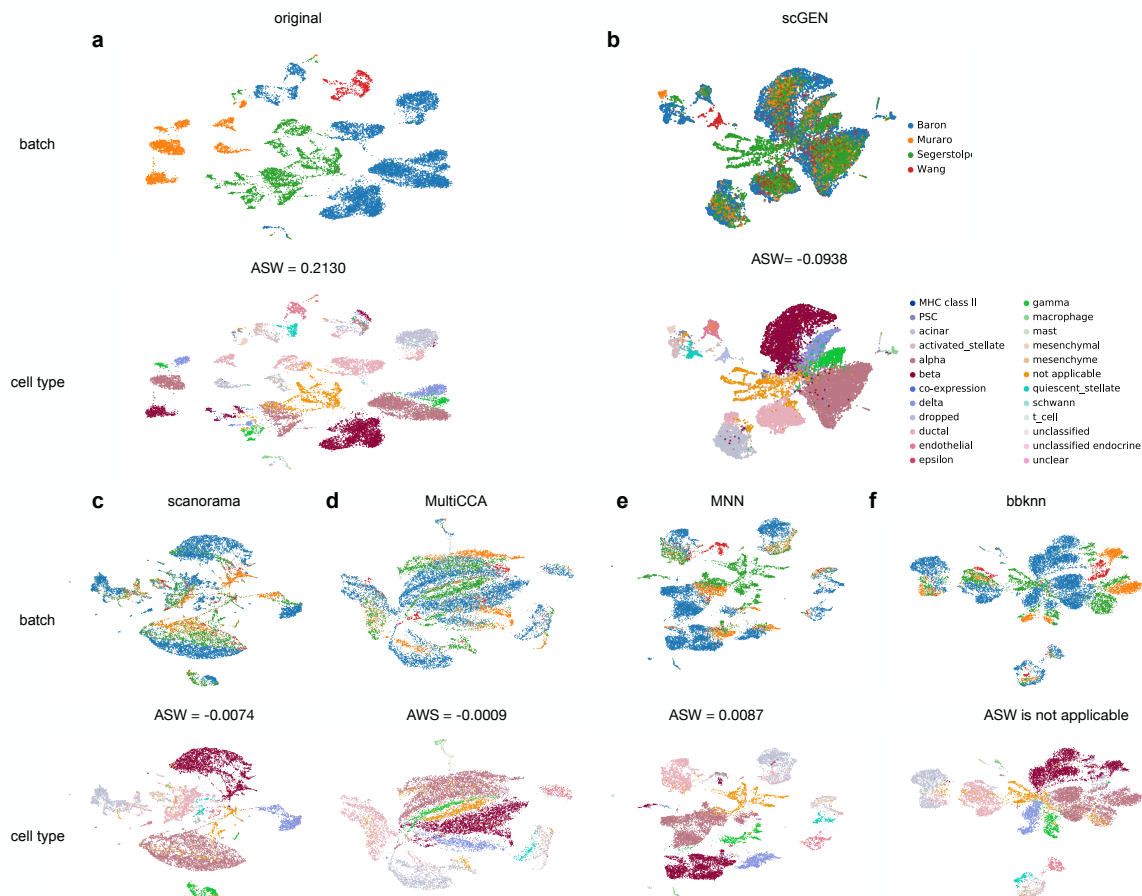

**Supplemental Figure 9 | Comparison of existing batch effect removal methods at integrating four different pancreatic datasets.** **a**, Original data contains large technical variation which causes similar cell types cluster separately. We report average silhouette width (ASW) for batches in the original data (ASW = 0.2130, lower is better). **b**, scGen aligns shared cell types in different studies while preserving study specific cell types independent after batch correction and returns lowest ASW (-0.0938). **c**, Scanorama merges shared cell types but they are not perfectly mixed and does not persevere the structure of the small study specific cell types. **d**, CCA connects batches well but shared cell types are not perfectly mixed. **e**, MNN mixes some cell types while keeping batch effect for others and it successfully preserves structure of study specific cell types. **f**, Results of bbknn show shared cell types are not perfectly mixed and some cell types are mistakenly merged into wrong clusters. In contrast to other methods this model only returns modified KNN graph and does not provide any form of corrected data thus ASW is not directly applicable to corrected data.

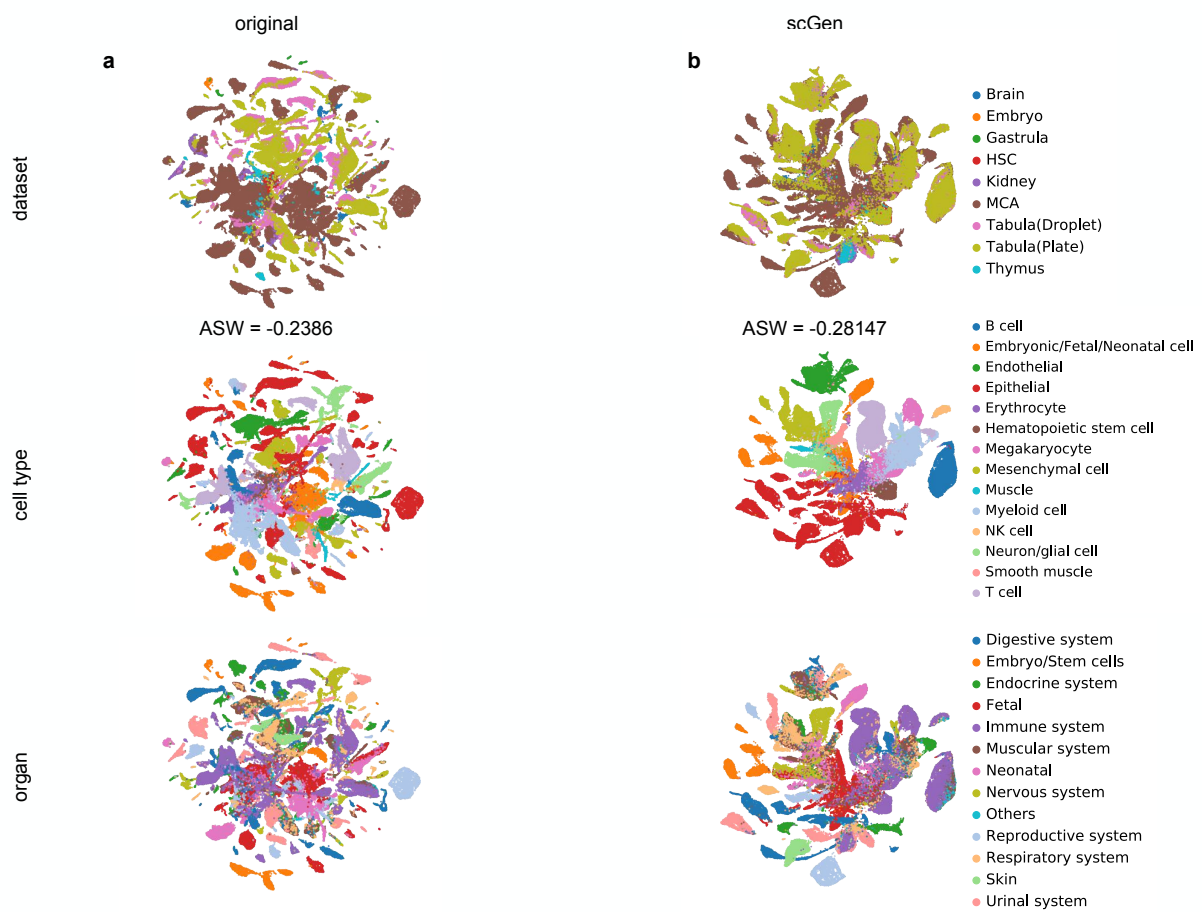

**Supplemental Figure 10 | scGen integrates eight mouse single cell atlases with 114600 cells.** **a**, UMAP visualization of eight different datasets with their corresponding study, cell type and organ labels. ASW was calculated based on the 57300 randomly sub-sampled cells with their study labels. **b**, scGen merges the data by connecting the similar cell types according to their cell labels while having lower ASW (-0.28147).

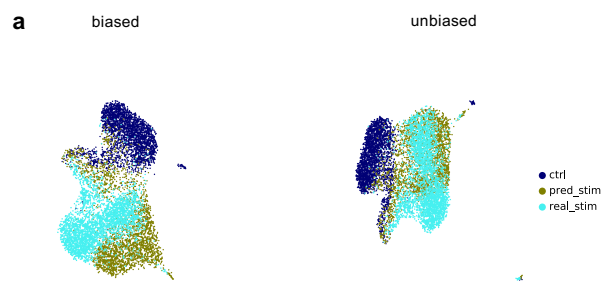

**Supplemental Figure 11 | Biased sampling effect.** **a**, UMAP visualization of CD4-T cells prediction depicts that unbiased predicted cells have more overlap with real stimulated cells than biased predictions.

## 465 References

- 466 [1] Stubbington, M. J., Rozenblatt-Rosen, O., Regev, A. & Teichmann, S. A. Single-cell transcrip-  
467 tomics to explore the immune system in health and disease. *Science* **358**, 58–63 (2017).
- 468 [2] Angerer, P. *et al.* Single cells make big data: new challenges and opportunities in transcrip-  
469 tomics. *Current Opinion in Systems Biology* **4**, 85–91 (2017).
- 470 [3] Kang, H. M. *et al.* Multiplexed droplet single-cell RNA-sequencing using natural genetic vari-  
471 ation. *Nature Biotechnology* **36**, 89–94 (2017).
- 472 [4] Haber, A. L. *et al.* A single-cell survey of the small intestinal epithelium. *Nature* **551**, 333–339  
473 (2017).
- 474 [5] Hagai, T. *et al.* Gene expression variability across cells and species shapes innate immunity.  
475 *Nature* **563**, 197 (2018).
- 476 [6] Dixit, A. *et al.* Perturb-Seq: Dissecting Molecular Circuits with Scalable Single-Cell RNA  
477 Profiling of Pooled Genetic Screens. *Cell* **167**, 1853–1866.e17 (2016).
- 478 [7] Adamson, B. *et al.* A Multiplexed Single-Cell CRISPR Screening Platform Enables Systematic  
479 Dissection of the Unfolded Protein Response. *Cell* **167**, 1867–1882 (2016).
- 480 [8] Datlinger, P. *et al.* Pooled CRISPR screening with single-cell transcriptome readout. *Nature*  
481 *Methods* **14**, 297–301 (2017).
- 482 [9] Kharchenko, P. V., Silberstein, L. & Scadden, D. T. Bayesian approach to single-cell differential  
483 expression analysis. *Nature methods* **11**, 740 (2014).
- 484 [10] Vallejos, C. A., Marioni, J. C. & Richardson, S. Basics: Bayesian analysis of single-cell sequenc-  
485 ing data. *PLoS computational biology* **11**, e1004333 (2015).
- 486 [11] Froehlich, F. *et al.* Efficient parameterization of large-scale mechanistic models enables drug  
487 response prediction for cancer cell lines. *bioRxiv* 174094 (2017).
- 488 [12] Choi, K., Hellerstein, J., Wiley, S. & Sauro, H. M. Inferring reaction networks using perturbation  
489 data. *bioRxiv* 351767 (2018).
- 490 [13] Lopez, R., Regier, J., Cole, M. B., Jordan, M. I. & Yosef, N. Deep generative modeling for  
491 single-cell transcriptomics. *Nature Methods* **15**, 1053–1058 (2018).
- 492 [14] Eraslan, G., Simon, L. M., Mircea, M., Mueller, N. S. & Theis, F. J. Single cell RNA-seq  
493 denoising using a deep count autoencoder. *bioRxiv* 300681 (2018).
- 494 [15] Ding, J., Condon, A. & Shah, S. P. Interpretable dimensionality reduction of single cell tran-  
495 scriptome data with deep generative models. *Nature Communications* **9**, 2002 (2018).
- 496 [16] Ghahramani, A., Watt, F. M. & Luscombe, N. M. Generative adversarial networks uncover  
497 epidermal regulators and predict single cell perturbations. *bioRxiv* 262501 (2018).
- 498 [17] Marouf, M. *et al.* Realistic in silico generation and augmentation of single cell RNA-seq data  
499 using Generative Adversarial Neural Networks. *bioRxiv* 390153 (2018).
- 500 [18] Saelens, W., Cannoodt, R., Todorov, H. & Saeys, Y. A comparison of single-cell trajectory  
501 inference methods: towards more accurate and robust tools. *bioRxiv* 276907 (2018).
- 502 [19] Kingma, D. P. & Welling, M. Auto-Encoding Variational Bayes. *The International Conference*  
503 *on Learning Representations (ICLR)* (2014).



- 504 [20] Abadi, M. *et al.* Tensorflow: a system for large-scale machine learning.
- 505 [21] Wolf, F. A., Angerer, P. & Theis, F. J. Scanpy: Large-scale single-cell gene expression data  
506 analysis. *Genome biology* **19**, 15 (2018).
- 507 [22] McInnes, L. & Healy, J. Umap: Uniform manifold approximation and projection for dimension  
508 reduction. *arXiv 1802.03426* (2018).
- 509 [23] Butler, A., Hoffman, P., Smibert, P., Papalexi, E. & Satija, R. Integrating single-cell transcrip-  
510 tomic data across different conditions, technologies, and species. *Nature biotechnology* **36**, 411  
511 (2018).
- 512 [24] Bendall, S. C. *et al.* Single-cell trajectory detection uncovers progression and regulatory coor-  
513 dination in human b cell development. *Cell* **157**, 714–725 (2014).
- 514 [25] Wolf, F. A. *et al.* Graph abstraction reconciles clustering with trajectory inference through a  
515 topology preserving map of single cells. *bioRxiv* 208819 (2017).
- 516 [26] Radford, A., Metz, L. & Chintala, S. Unsupervised representation learning with deep convolu-  
517 tional generative adversarial networks. *The International Conference on Learning Representa-*  
518 *tions (ICLR)* (2016).
- 519 [27] Mikolov, T., Chen, K., Corrado, G. & Dean, J. Efficient estimation of word representations in  
520 vector space. *ICLR Workshop* (2013).
- 521 [28] Sohn, K., Lee, H. & Yan, X. Learning structured output representation using deep conditional  
522 generative models. In *Advances in Neural Information Processing Systems*, 3483–3491 (2015).
- 523 [29] Liu, M.-Y. & Tuzel, O. Coupled generative adversarial networks. In *Advances in neural infor-*  
524 *mation processing systems*, 469–477 (2016).
- 525 [30] Zhu, J.-Y., Park, T., Isola, P. & Efros, A. A. Unpaired image-to-image translation using cycle-  
526 consistent adversarial networks. In *IEEE International Conference on Computer Vision (ICCV)*  
527 (2017).
- 528 [31] Amodio, M. & Krishnaswamy, S. Magan: Aligning biological manifolds. *arXiv 1803.00385*  
529 (2018).
- 530 [32] Clift, M. J. *et al.* A novel technique to determine the cell type specific response within an in  
531 vitro co-culture model via multi-colour flow cytometry. *Scientific reports* **7**, 434 (2017).
- 532 [33] Schubert, M. *et al.* Perturbation-response genes reveal signaling footprints in cancer gene  
533 expression. *Nature communications* **9**, 20 (2018).
- 534 [34] Zheng, G. X. *et al.* Massively parallel digital transcriptional profiling of single cells. *Nature*  
535 *communications* **8**, 14049 (2017).
- 536 [35] Regev, A. *et al.* Science Forum: The Human Cell Atlas. *eLife* **6**, e27041 (2017).
- 537 [36] Baron, M. *et al.* A single-cell transcriptomic map of the human and mouse pancreas reveals  
538 inter-and intra-cell population structure. *Cell systems* **3**, 346–360 (2016).
- 539 [37] Segerstolpe, Å. *et al.* Single-cell transcriptome profiling of human pancreatic islets in health  
540 and type 2 diabetes. *Cell metabolism* **24**, 593–607 (2016).
- 541 [38] Wang, Y. J. *et al.* Single-cell transcriptomics of the human endocrine pancreas. *Diabetes* **65**,  
542 3028–3038 (2016).
- 543 [39] Muraro, M. J. *et al.* A single-cell transcriptome atlas of the human pancreas. *Cell systems* **3**,  
544 385–394 (2016).

- 545 [40] Hie, B. L., Bryson, B. & Berger, B. Panoramic stitching of heterogeneous single-cell transcrip-  
546 tomic data. *bioRxiv* 371179 (2018).
- 547 [41] Park, J.-E., Polanski, K., Meyer, K. & Teichmann, S. A. Fast Batch Alignment of Single Cell  
548 Transcriptomes Unifies Multiple Mouse Cell Atlases into an Integrated Landscape. *bioRxiv*  
549 397042 (2018).
- 550 [42] Haghverdi, L., Lun, A. T. L., Morgan, M. D. & Marioni, J. C. Batch effects in single-cell RNA-  
551 sequencing data are corrected by matching mutual nearest neighbors. *Nature Biotechnology* **36**,  
552 421 (2018).
- 553 [43] Zeisel, A. *et al.* Cell types in the mouse cortex and hippocampus revealed by single-cell RNA-seq.  
554 *Science* **347**, 1138–1142 (2015).
- 555 [44] Schaum, N. *et al.* Single-cell transcriptomics of 20 mouse organs creates a tabula muris. *Nature*  
556 **562**, 367–372 (2018).
- 557 [45] Han, X. *et al.* Mapping the mouse cell atlas by microwell-seq. *Cell* **172**, 1091–1107 (2018).
- 558 [46] Deng, Q., Ramsköld, D., Reinius, B. & Sandberg, R. Single-cell RNA-seq reveals dynamic,  
559 random monoallelic gene expression in mammalian cells. *Science* **343**, 193–196 (2014).
- 560 [47] Kernfeld, E. M. *et al.* A Single-Cell Transcriptomic Atlas of Thymus Organogenesis Resolves  
561 Cell Types and Developmental Maturation. *Immunity* **48**, 1258–1270.e6 (2018).
- 562 [48] Park, J. *et al.* Single-cell transcriptomics of the mouse kidney reveals potential cellular targets  
563 of kidney disease. *Science* eaar2131 (2018).
- 564 [49] Mohammed, H. *et al.* Single-cell landscape of transcriptional heterogeneity and cell fate decisions  
565 during mouse early gastrulation. *Cell reports* **20**, 1215–1228 (2017).
- 566 [50] Dahlin, J. S. *et al.* A single-cell hematopoietic landscape resolves 8 lineage trajectories and  
567 defects in kit mutant mice. *Blood* **131**, e1–e11 (2018).
- 568 [51] Way, G. P. & Greene, C. S. Extracting a biologically relevant latent space from cancer tran-  
569 scriptomes with variational autoencoders. *bioRxiv* 174474 (2017).
- 570 [52] Smillie, C. S. *et al.* Rewiring of the cellular and inter-cellular landscape of the human colon  
571 during ulcerative colitis. *bioRxiv* 455451 (2018).
- 572 [53] Amodio, M., Montgomery, R., Pappalardo, J., Hafler, D. & Krishnaswamy, S. Neuron interfer-  
573 ence: Evidence-based batch effect removal. *arXiv 1805.12198* (2018).
- 574 [54] Doersch, C. Tutorial on variational autoencoders. *arXiv 1606.05908* (2016).
- 575 [55] White, T. Sampling generative networks: Notes on a few effective techniques. *arXiv 1609.04468*  
576 (2016).
- 577 [56] Durinck, S., Spellman, P. T., Birney, E. & Huber, W. Mapping identifiers for the integration  
578 of genomic datasets with the R/bioconductor package biomart. *Nature Protocols* **4**, 1184–1191  
579 (2009).
- 580 [57] Ioffe, S. & Szegedy, C. Batch normalization: Accelerating deep network training by reducing  
581 internal covariate shift. In *Proceedings of the 32Nd International Conference on International  
582 Conference on Machine Learning - Volume 37, ICML'15*, 448–456 (2015).
- 583 [58] Srivastava, N., Hinton, G., Krizhevsky, A., Sutskever, I. & Salakhutdinov, R. Dropout: a simple  
584 way to prevent neural networks from overfitting. *The Journal of Machine Learning Research*  
585 **15**, 1929–1958 (2014).

- 586 [59] Kingma, D. P. & Ba, J. Adam: A method for stochastic optimization. *The International*  
587 *Conference on Learning Representations (ICLR)* (2015).
- 588 [60] Pedregosa, F. *et al.* Scikit-learn: Machine learning in Python. *Journal of Machine Learning*  
589 *Research* **12**, 2825–2830 (2011).
